# Supplementary material for: Tumor emergence is sensed by self-specific CD44hi memory Tregs that create a dominant tolerogenic environment for tumors in mice
Source: JCI journal article supplement (doi:10.1172/jci36628), 2009-08-03
Supplement: sd1 [file 1]

## Supplementary data

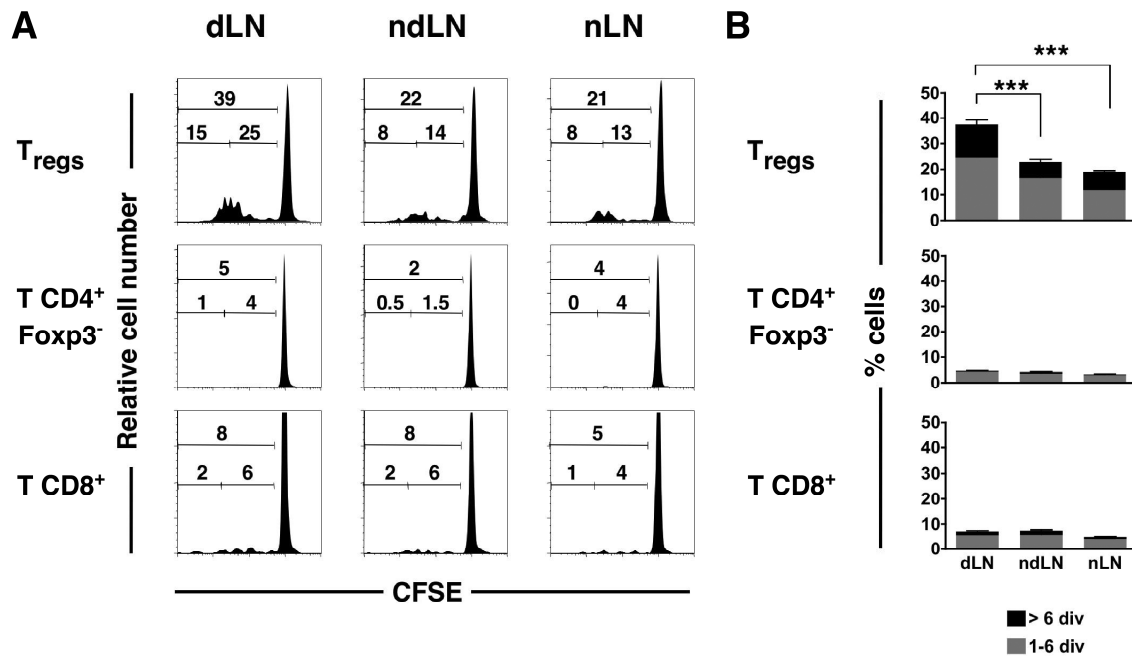

**Supplementary Figure 1**

**Memory-like proliferation of T<sub>regs</sub> in 4T1 tumor-bearing mice.** One day 4T1 tumor-bearing or un-manipulated mice received CFSE-labeled Thy1.1 congenic cells from normal BALB/c mice. Division profiles of Thy1.1<sup>+</sup> donor cells were evaluated by flow cytometry in dLNs and ndLNs of tumor bearers, or in nLNs from tumor free mice, 3 days after adoptive transfer. **(A)** Percentage of cells that had undergone no (CFSE<sup>hi</sup>), few (CFSE<sup>int</sup>) or more than 6 divisions (CFSE<sup>-</sup>) are shown in each panel. **(B)** Corresponding mean percentages of expended cells  $\pm$ SD from **(A)**. CD4<sup>+</sup>Foxp3<sup>+</sup> from dLNs divide significantly more than in other organs (\*\*\*:  $P < 0.0001$ ). Each panel is representative of three mice per experiment (2 experiments).

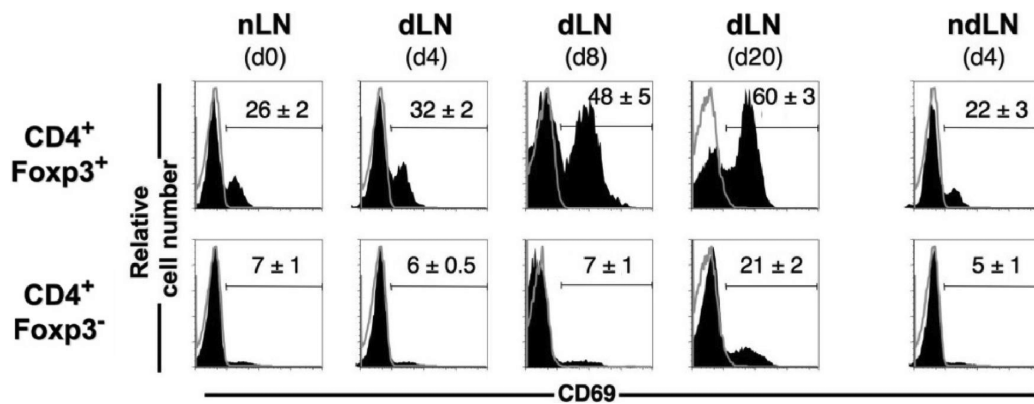

## Supplementary Figure 2

**Activation status of T<sub>regs</sub> and T<sub>effs</sub> of tumor-bearing mice assessed by CD69 expression.** Levels of CD69 (Very Early Activation Antigen) expressed by Foxp3<sup>+</sup> and Foxp3<sup>-</sup> CD4<sup>+</sup> T-cells from dLNs, ndLNs or nLNs were evaluated by flow cytometry at days 4, 8 and 20 of 4T1 tumor growth. Each panel is representative of three mice per experiment. Mean percentages  $\pm$ SD of CD69<sup>+</sup> cells among indicated T-cell populations are illustrated. Gray histograms represent the background staining with isotype matched irrelevant mAbs. Representative flow cytometry analyses of one of two independent experiments are shown.

**A**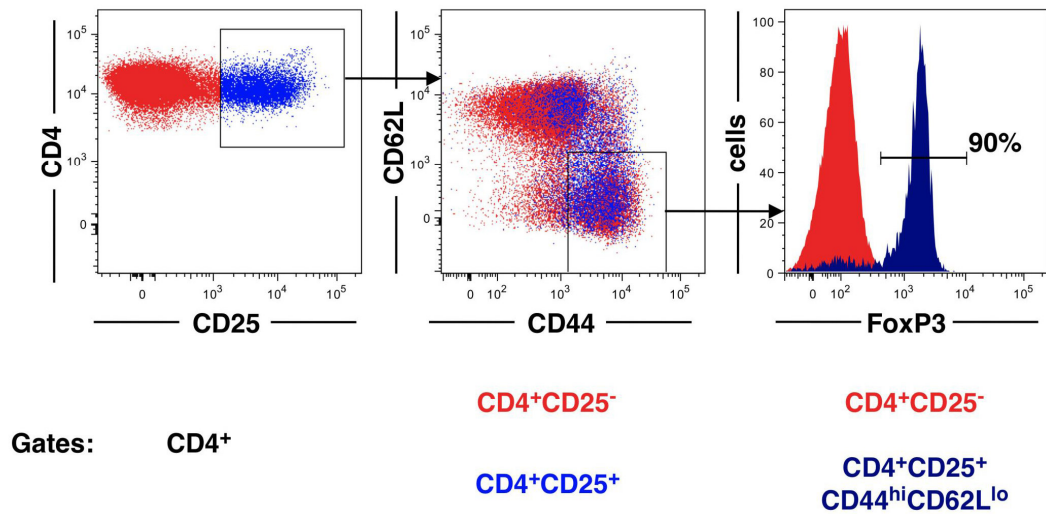**B**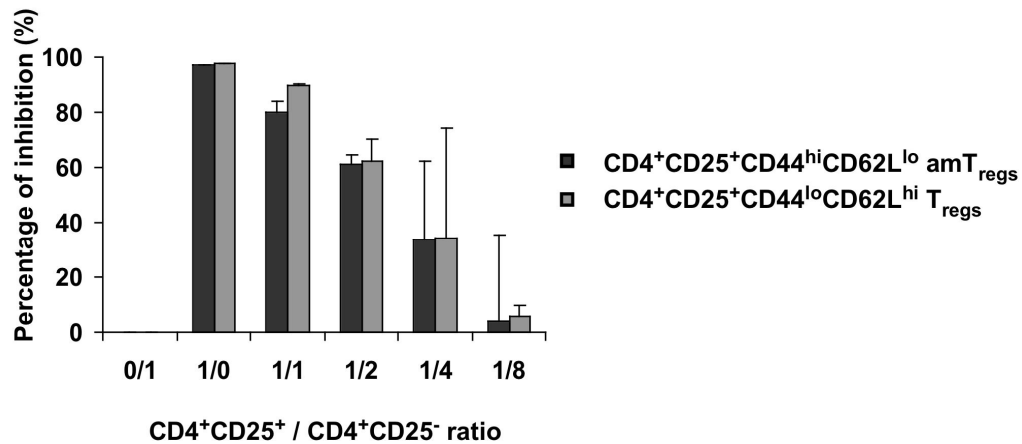**Supplementary Figure 3**

**CD4<sup>+</sup>CD25<sup>+</sup>CD44<sup>hi</sup>CD62L<sup>lo</sup> T-cells express Foxp3 and are bona fide memory Tregs.**

(A) Flow cytometry gating strategy and Foxp3 expression of CD4<sup>+</sup>CD25<sup>+</sup>CD44<sup>hi</sup>CD62L<sup>lo</sup> T cells from normal mice. (B) Inhibition of T-cell proliferation in vitro. 5 × 10<sup>4</sup> CD4<sup>+</sup>CD25<sup>-</sup> T-cells and the indicated ratio of CD4<sup>+</sup>CD25<sup>+</sup>CD44<sup>hi</sup>CD62L<sup>lo</sup> amT<sub>regs</sub> (black) or CD4<sup>+</sup>CD25<sup>+</sup>CD44<sup>lo</sup>CD62L<sup>hi</sup> T<sub>regs</sub> (gray) were incubated with anti-CD3 and anti-CD28 mAbs for 3 days. Proliferation was measured by adding <sup>3</sup>H thymidine at day 3 to 4 of culture. Mean percentages of inhibition ± SEM of the proliferation are shown (triplicate cultures). Both populations of T<sub>regs</sub> are equally suppressive.

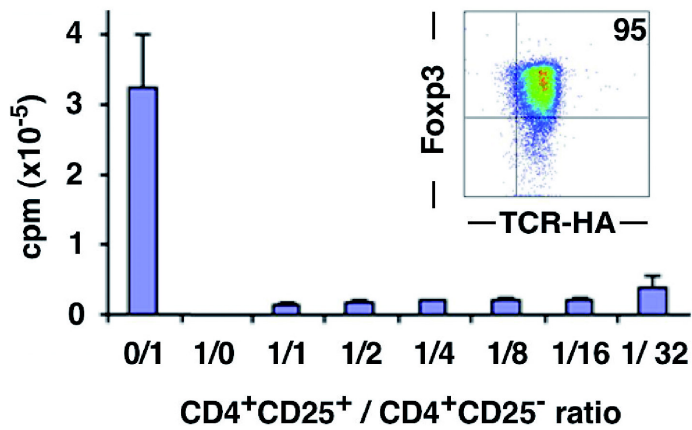

#### Supplementary Figure 4

**Peptide specific suppression assay of cultured TCR-HA T<sub>regs</sub>.** TCR-HA T<sub>regs</sub> were cultured in vitro (43). Flow cytometry profile of the cultured CD4<sup>+</sup>CD25<sup>+</sup>Foxp3<sup>+</sup> TCR-HA T<sub>regs</sub> is shown in the inserted panel. 5 × 10<sup>4</sup> CD4<sup>+</sup>CD25<sup>-</sup> T-cells and the indicated ratio of CD4<sup>+</sup>CD25<sup>+</sup> TCR-HA T<sub>regs</sub> were incubated with 10<sup>4</sup> HA-loaded CD11c<sup>+</sup> DCs for 3 days. Proliferation was measured by adding <sup>3</sup>H thymidine at day 3 to 4 of culture. Mean cpm of suppression ±SEM are shown (triplicate cultures). In vitro cultured TCR-HA T<sub>regs</sub> have an extremely potent suppressor activity.

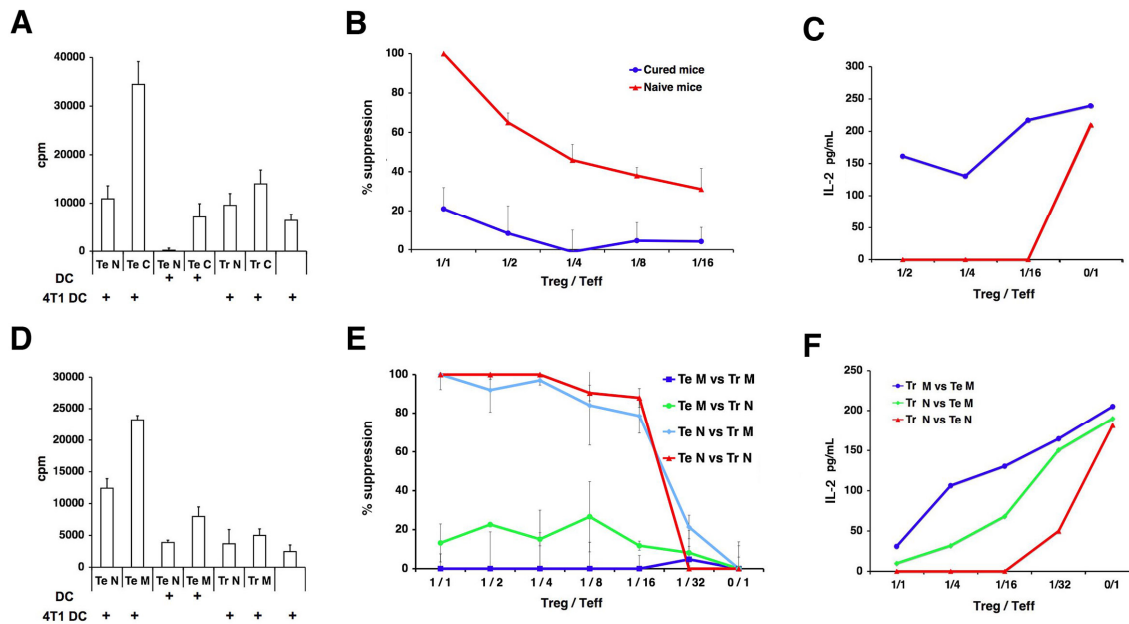

**Supplementary Figure 5**

**Antitumor activated/memory Tregs resist to Treg suppression *in vitro*.** (A-C)  $5 \times 10^4$  CD4<sup>+</sup>CD25<sup>-</sup> cells and the indicated ratio of CD4<sup>+</sup>CD25<sup>+</sup> cells from the naive mice (TeN and TrN respectively) or from the mice cured of 4T1 tumors by anti CD25 treatment 6 months earlier (TeC and TrC) were incubated with CD11c<sup>+</sup> dendritic cells pulsed with 4T1 lysate. Inhibition of proliferation was measured by adding <sup>3</sup>H thymidine at day 3 to 4 of culture. Mean cpm (A) and mean percentages of suppression (B) observed are shown. IL-2 present in the culture supernatant was also evaluated at day 1.5 of culture using beads array assay (C). (D-F) Resistance to suppression of  $4 \times 10^4$  CD4<sup>+</sup>CD44<sup>hi</sup>CD45RB<sup>lo</sup>CD25<sup>-</sup> cells (TeM) from the cured mice and of  $4 \times 10^4$  CD4<sup>+</sup>CD44<sup>int</sup>CD45RB<sup>int</sup>CD25<sup>-</sup> cells (TeN) from the naive mice was tested against the indicated ratio of CD4<sup>+</sup>CD44<sup>int</sup>CD45RB<sup>int</sup>CD25<sup>+</sup> Tregs (TrN) from the naive mice or CD4<sup>+</sup>CD44<sup>hi</sup>CD45RB<sup>lo</sup>CD25<sup>+</sup> Tregs (TrM) from the 4T1-cured mice. Culture conditions were identical to (A). Results are expressed as the mean  $\pm$ SEM of triplicate cultures.
